# Supplementary material
Source: publisher site journal article supplement (https://www.spandidos-publications.com/3318/downloadSupplementary)

Figure S1. (A) LOXL1 mRNA and protein expression in liver cancer cells transfected with sh-LOXL1-AS1 or sh-NC was detected by RT-qPCR and western blot analysis, respectively. (B) NFIB expression in SK-HEP-1 and Hep3B cells transfected with pcDNA3.1 and pcDNA3.1/NFIB was detected by RT-qPCR. \*\* $P < 0.01$  vs. pcDNA3.1. RT-qPCR, reverse transcription-quantitative PCR; LOXL1-AS1, LOXL1-antisense RNA 1; sh, short hairpin RNA; NC, negative control; NFIB, nuclear factor I B.

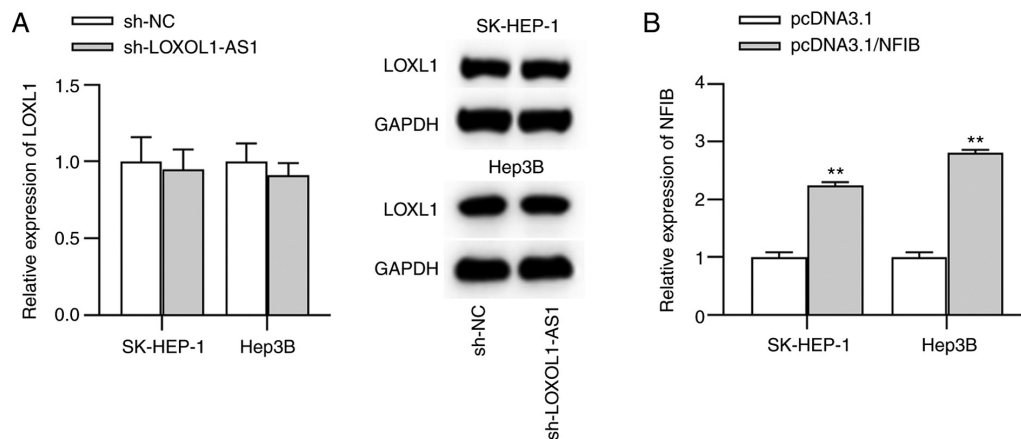

Supplement: Supplementary file 1 [file downloadSupplementary]
